# Supplementary material for: Use of HSALR female mice as a model for the study of myotonic dystrophy type I
Source: Springer Nature journal article supplement (doi:10.1038/s41684-025-01506-7), 2025-02-27
Supplement: MOESM1 [file 41684_2025_1506_MOESM1_ESM.pdf]

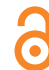

<https://doi.org/10.1038/s41684-025-01506-7>

# Use of HSA<sup>LR</sup> female mice as a model for the study of myotonic dystrophy type I

In the format provided by the  
authors and unedited

## Supplementary material

### Methods: DNA extraction and genotyping.

Primers list for HSA transgene quantification.

|       |              |                                  |
|-------|--------------|----------------------------------|
| PCR 1 | MSA1 Primer  | 5'-TCCTCAGGACGACAATCGAC-3'       |
|       | MSA2 Primer  | 5'-CCTAAGGAGTTCACCCAGTCTG-3'     |
|       | HSA23 Primer | 5'-AAACTTACATCTTCCCATGCTCC-3'    |
|       | HSA24 Primer | 5'-GAGACGCCCTCTGAGAAACAG-3'      |
| PCR 2 | HSA10 Primer | 5'-TCCACCGCAAATGCTTCTAGACACAC-3' |
|       | HSA18 Primer | 5'-GCAGGGGAGCATGGGAAGATGTAAG-3'  |

### Methods: RNA extraction, RT-PCR, semiquantitative PCR and RT-qPCR.

Primers list for RT-qPCR.

|                       |                                                      |
|-----------------------|------------------------------------------------------|
| <i>Gapdh</i> Probe    | 5'/5MAXN/-CGCCTGGTCACCAGGGCTGCT-/3BHQ_1/-3'          |
| <i>Gapdh</i> Primer 1 | 5'- GAACGGATTTGGCCGTATTGG-3'                         |
| <i>Gapdh</i> Primer 2 | 5'- GATGGCAACAATCTCCACTTTGCC -3'                     |
| <i>Mbnl1</i> Probe    | 5'-/56-FAM/TCGCAAATCAGCTGTGAGGAGATTCCCT/3IAbRQSp/-3' |
| <i>Mbnl1</i> Primer 1 | 5'- TACCGATTGCACCACCAAAC -3'                         |
| <i>Mbnl1</i> Primer 2 | 5'- GCTGCTTTCAGCAAAGTTGTC -3'                        |
| <i>Mbnl2</i> Probe    | 5'-/56-FAM/CCCGGCAGACAGCACCATGATCGA/3IAbRQSp/-3'     |
| <i>Mbnl2</i> Primer 1 | 5'- GAGACAGACTGCCGCTTTG-3'                           |
| <i>Mbnl2</i> Primer 2 | 5'- GGTTACGGTGTTGTCGTTTGT-3'                         |

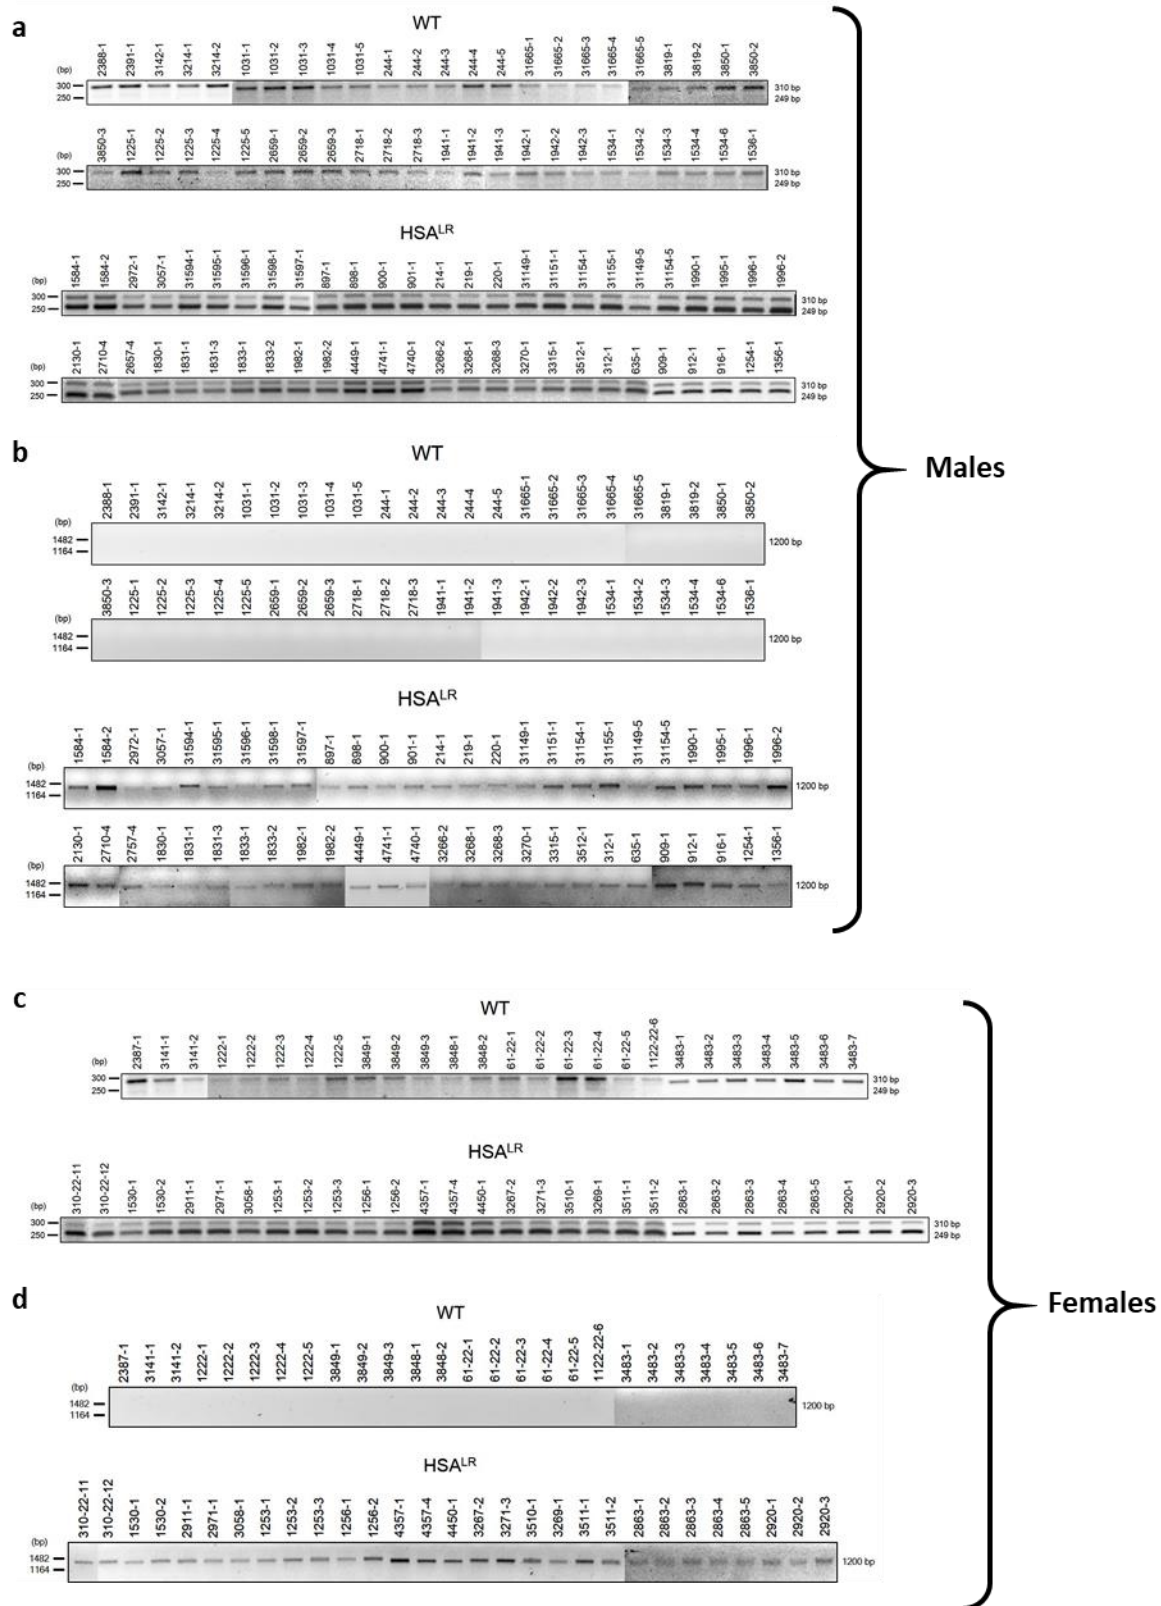

**Supplementary Figure 1. Genotyping in 100 males (a, b) and 55 females (c, d) according to the protocol described in the methods. (a, c) The first PCR displays a single 310 bp band in controls and an extra 249 bp band in HSA<sup>LR</sup>, corresponding to the human transgene. (b, d) The second PCR is negative in controls and amplifies a 1200 bp fragment in HSA<sup>LR</sup> mice, corresponding to the CTG repeats.**

a

| Two-ways ANOVA                   | Source of variation (p-values) |                |            |
|----------------------------------|--------------------------------|----------------|------------|
| Phenotype                        | Genotype                       | Sex            | Genot*Sex  |
| <i>HSA transgene expression</i>  | <2e-16 (***)                   | 0.0184 (*)     | 0.0307 (*) |
| <i>Myotonia</i>                  | <2e-16 (***)                   | 0.0504         | 0.2367     |
| <i>Weight [g]</i>                | 8.37e-13 (***)                 | 7.76e-06 (***) | 0.286      |
| <i>Weight increase [fold]</i>    | 7.27e-06 (***)                 | 0.534          | 0.505      |
| <i>Forelimb strength</i>         | 8.43e-16 (***)                 | 0.984          | 0.139      |
| <i>Forelimb strength/ weight</i> | 2.40e-16 (***)                 | 2.67e-05 (***) | 0.828      |

b

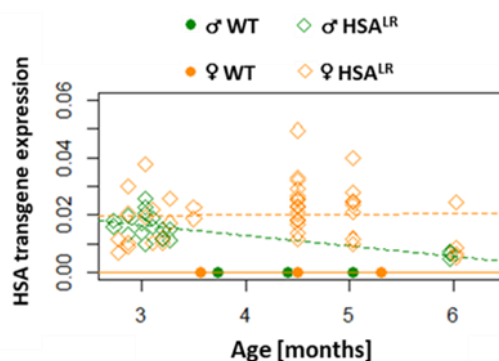

c

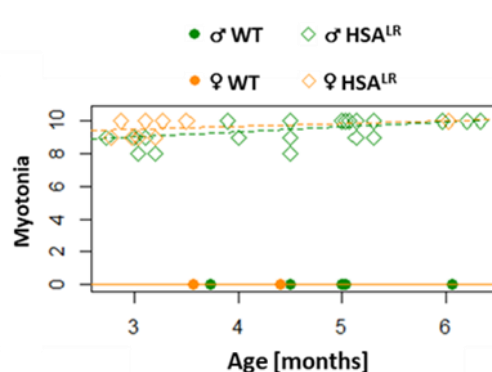

d

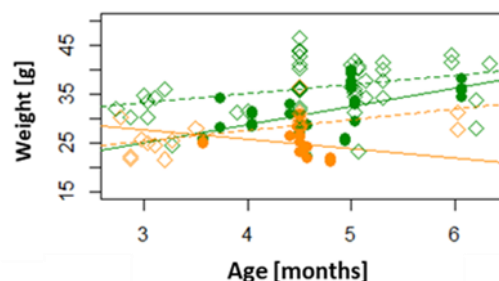

e

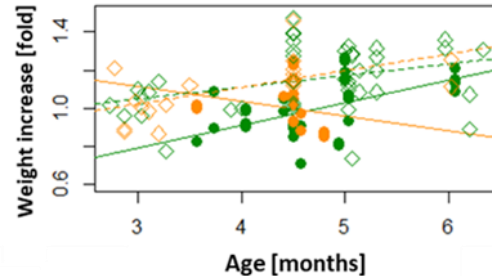

f

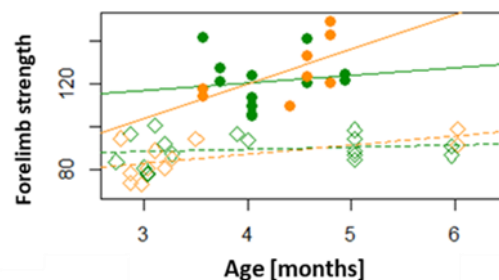

g

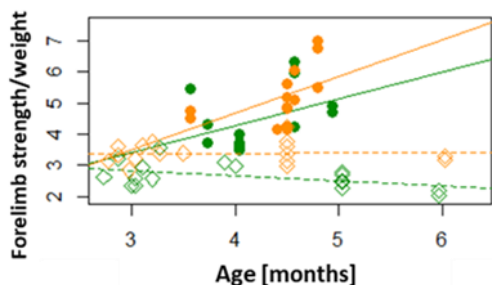

h

| Three-ways ANOVA                 | Source of variation (p-values) |                |                |            |                |            |               |
|----------------------------------|--------------------------------|----------------|----------------|------------|----------------|------------|---------------|
| Phenotype                        | Genotype                       | Sex            | Age            | Sex*Genot  | Genot*age      | Sex*age    | Sex*Genot*age |
| <i>HSA transgene expression</i>  | <2e-16 (***)                   | 0.0158 (*)     | 0.1915         | 0.0166 (*) | 0.4412         | 0.0260 (*) | 0.2774        |
| <i>Myotonia</i>                  | <2e-16 (***)                   | 0.612622       | 0.000271 (***) | 0.805263   | 0.057866       | 0.314276   | 0.836392      |
| <i>Weight [g]</i>                | 1.17e-06 (***)                 | 1.71e-14 (***) | 5.30e-06 (***) | 0.4648     | 0.3451         | 0.5356     | 0.0771        |
| <i>Weight increase [fold]</i>    | 1.01e-06 (***)                 | 0.494          | 4.97e-06 (***) | 0.772      | 0.861          | 0.434      | 0.046 (*)     |
| <i>Forelimb strength</i>         | 7.48e-16 (***)                 | 0.9836         | 0.0306 (*)     | 0.2341     | 0.1908         | 0.1825     | 0.3555        |
| <i>Forelimb strength/ weight</i> | <2e-16 (***)                   | 6.93e-06 (***) | 0.873087       | 0.824913   | 0.000515 (***) | 0.184276   | 0.919766      |

**Supplementary Figure 2. Organismal-level phenotypes analysis** (a) Statistical analysis of organismal-level phenotypes. ANOVA two-way separates the effect of sex (males vs females) and Genotype (Control vs HSA<sup>LR</sup>) and detects interaction between them (Genot\*Sex). (b-g) Data from Figure 1 is represented according to the age of the animals. Tendency lines are drawn: regular lines correspond to control animals, and dotted lines correspond to HSA<sup>LR</sup> animals. (h) Three-way ANOVA (Genotype, Sex and Age) is performed to detect the influence of age on the phenotypes. [\*\*\*: p < 0.001; \*\*: p < 0.01; \*: p < 0.05].

a

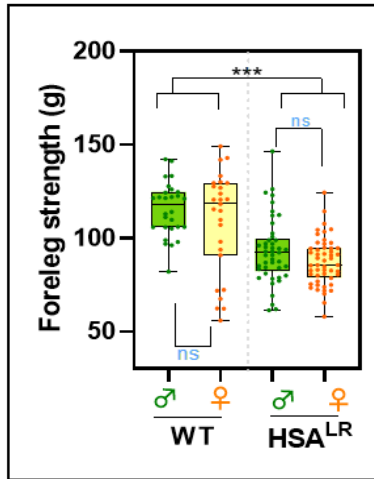

b

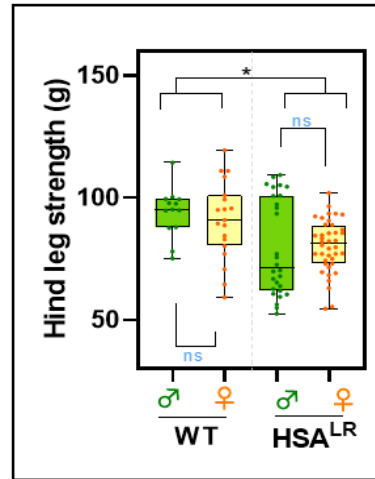

c

| Phenotype         | Males WT             |    | Females WT           |    | Males HSA <sup>LR</sup> |    | Females HSA <sup>LR</sup> |    |
|-------------------|----------------------|----|----------------------|----|-------------------------|----|---------------------------|----|
|                   | Average age (months) | n  | Average age (months) | n  | Average age (months)    | n  | Average age (months)      | n  |
| Foreleg strength  | 3,7                  | 28 | 3,8                  | 27 | 3,8                     | 45 | 4,2                       | 51 |
| Hind leg strength | 3,4                  | 14 | 3,9                  | 19 | 3,5                     | 28 | 4,2                       | 40 |

**Supplementary Figure 3. Functional analysis.** Analysis of foreleg (a) and hindleg (b) of a larger set of young mice with an average age of 3,4 to 4,2 months (c) confirms observations presented in **Figure 1**. [\*\*\*:  $p < 0.001$ ; \*:  $p < 0.05$ ; ns: non-significant].

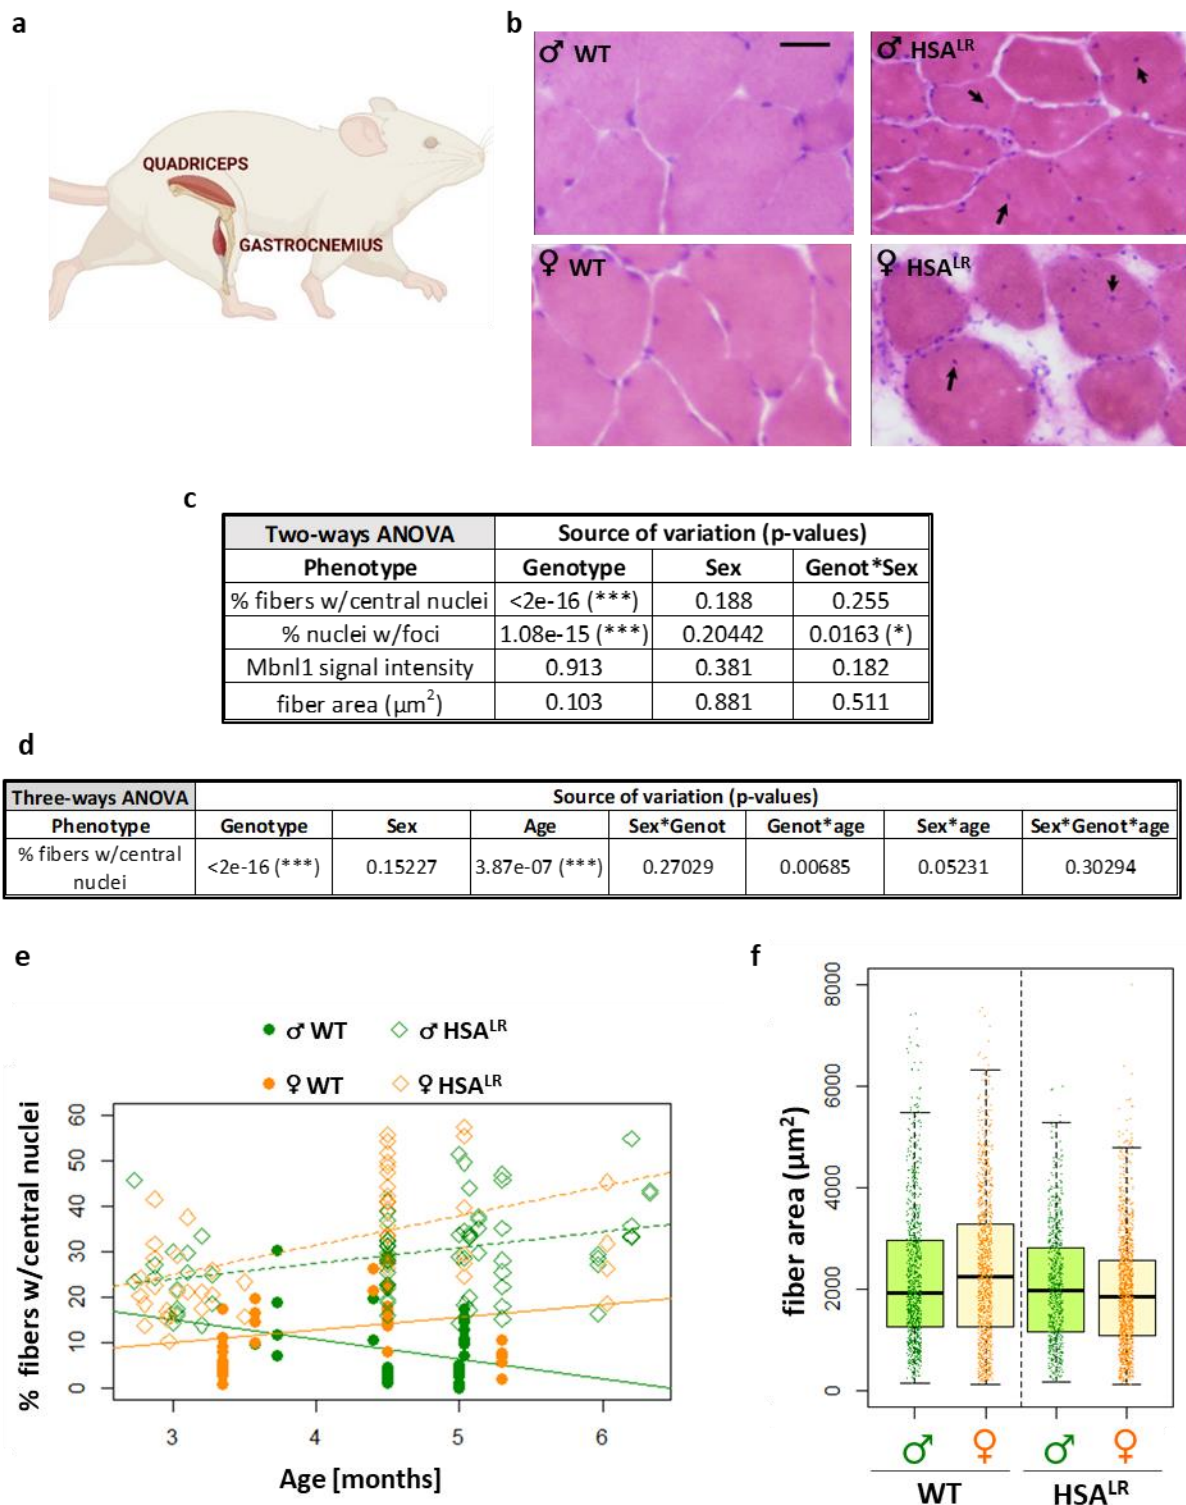

**Supplementary Figure 4. Muscle fiber analysis.** (a) Anatomical disposition of muscles studied: *quadriceps* and *gastrocnemius* (created with BioRender) (b) Bright-field microscopy pictures (200X magnification; scale bar = 50  $\mu\text{m}$ ) of hematoxylin/eosin staining of *gastrocnemius* sections show an increased amount of central nuclei (black arrows).. (c) Statistical analysis of histology phenotypes. Two-way ANOVA shows that the effect of sex and the interaction Genot\*Sex is significant for the presence of foci and intensity of Mbnl1 signal. [\*\*\*:  $p < 0.001$ ; \*\*:  $p < 0.01$ ; \*:  $p < 0.05$ ] (d) Three-way ANOVA (Genotype, Sex and Age) is performed to detect the influence of age on the percentage of fibers with central nuclei [\*\*\*:  $p < 0.001$ ] (e) The percentage of fibers with central nuclei in *gastrocnemius* and *quadriceps* according to age. (f) Fiber area measured in sections of 20 animals ( $n=5$  per group, 4,5 months old).

a

| Two-ways ANOVA    |                | Source of variation (p-values) |           |  |
|-------------------|----------------|--------------------------------|-----------|--|
| Phenotype         | Genotype       | Sex                            | Genot*Sex |  |
| <i>Mbnl1</i> mRNA | 5.83e-08 (***) | 0.548                          | 0.544     |  |
| <i>Mbnl2</i> mRNA | 1.38e-06 (***) | 0.782                          | 0.960     |  |
| Mbnl1 protein     | 0.0121 (*)     | 0.8944                         | 0.8273    |  |
| miR-218           | 2.55e-06 (***) | 0.501                          | 0.103     |  |

b

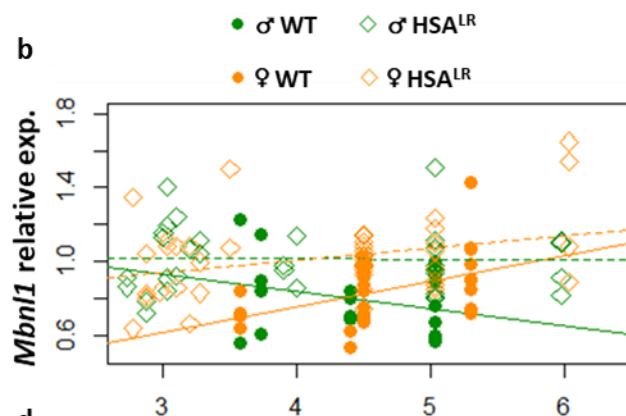

c

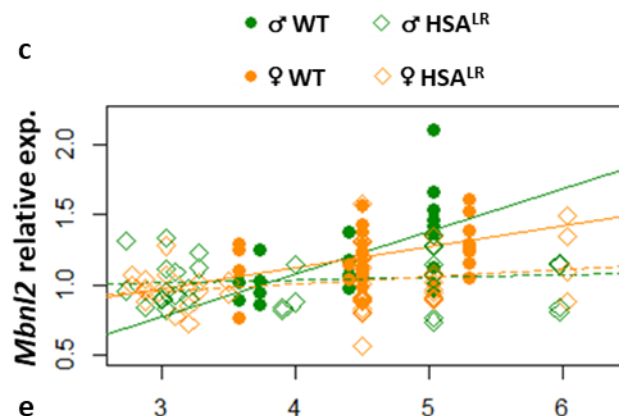

d

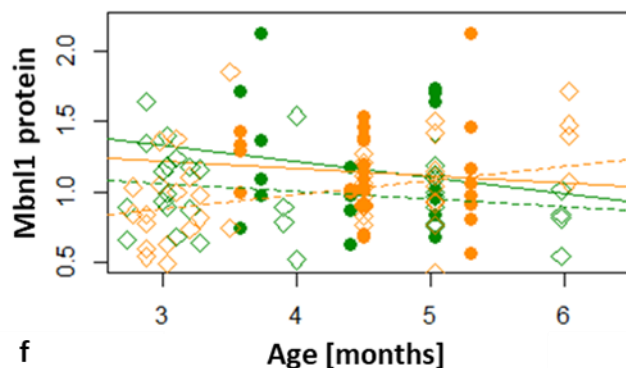

e

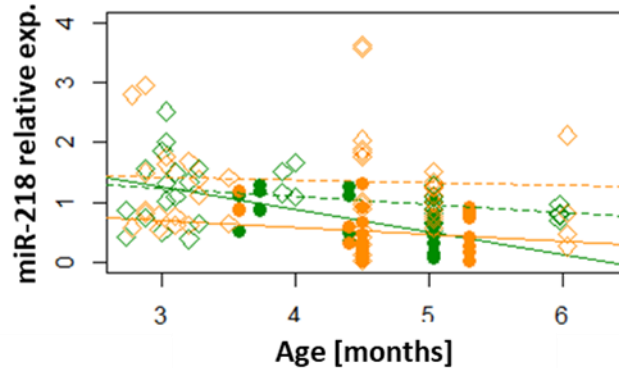

f

| Three-ways ANOVA  |                | Source of variation (p-values) |              |           |              |            |               |
|-------------------|----------------|--------------------------------|--------------|-----------|--------------|------------|---------------|
| Phenotype         | Genotype       | Sex                            | Age          | Sex*Genot | Genot*age    | Sex*age    | Sex*Genot*age |
| <i>Mbnl1</i> mRNA | 2.37e-08 (***) | 0.5342                         | 0.0607       | 0.5242    | 0.9924       | 0.0101 (*) | 0.1082        |
| <i>Mbnl2</i> mRNA | 2.63e-07 (***) | 0.76654                        | 0.00189 (**) | 0.94560   | 0.00128 (**) | 0.89021    | 0.10181       |
| Mbnl1 protein     | 0.0112 (*)     | 0.8931                         | 0.7141       | 0.8245    | 0.1847       | 0.0295 (*) | 0.5929        |
| miR-218           | 2.81e-06 (***) | 0.502                          | 0.157        | 0.105     | 0.491        | 0.464      | 0.690         |

**Supplementary Figure 5. Muscleblind family analysis.** (a) ANOVA two-way shows that phenotypes analyzed are strongly determined by Genotype (Ctrl vs. HSA<sup>LR</sup>) but not by sex. (b-e) Data from Figure 3 are represented according to the age of the animals. Trend lines are drawn: regular lines correspond to control animals, and dotted lines correspond to HSA<sup>LR</sup> animals. (f) Three-way ANOVA (Genotype, Sex and Age) is performed to detect the influence of age on the phenotypes [\*\*\*:  $p < 0.001$ ; \*\*:  $p < 0.01$ ; \*:  $p < 0.05$ ].



a

| Two-ways ANOVA                 |              | Source of variation (p-values) |           |  |
|--------------------------------|--------------|--------------------------------|-----------|--|
| Phenotype                      | Genotype     | Sex                            | Genot*Sex |  |
| <i>Nfix</i> % ex7 inclusion    | <2e-16 (***) | 0.380                          | 0.301     |  |
| <i>Mbnl1</i> % ex5 inclusion   | <2e-16 (***) | 0.0195 (*)                     | 0.2661    |  |
| <i>Clcn1</i> % ex7a inclusion  | <2e-16 (***) | 0.575                          | 0.284     |  |
| <i>Atp2a1</i> % ex22 inclusion | <2e-16 (***) | 0.0077 (**)                    | 0.08134   |  |
| <i>Bin1</i> % ex11 inclusion   | <2e-16 (***) | 0.846                          | 0.942     |  |
| <i>Cacna1s</i> ex29 inclusion  | <2e-16 (***) | 0.0784                         | 0.2115    |  |

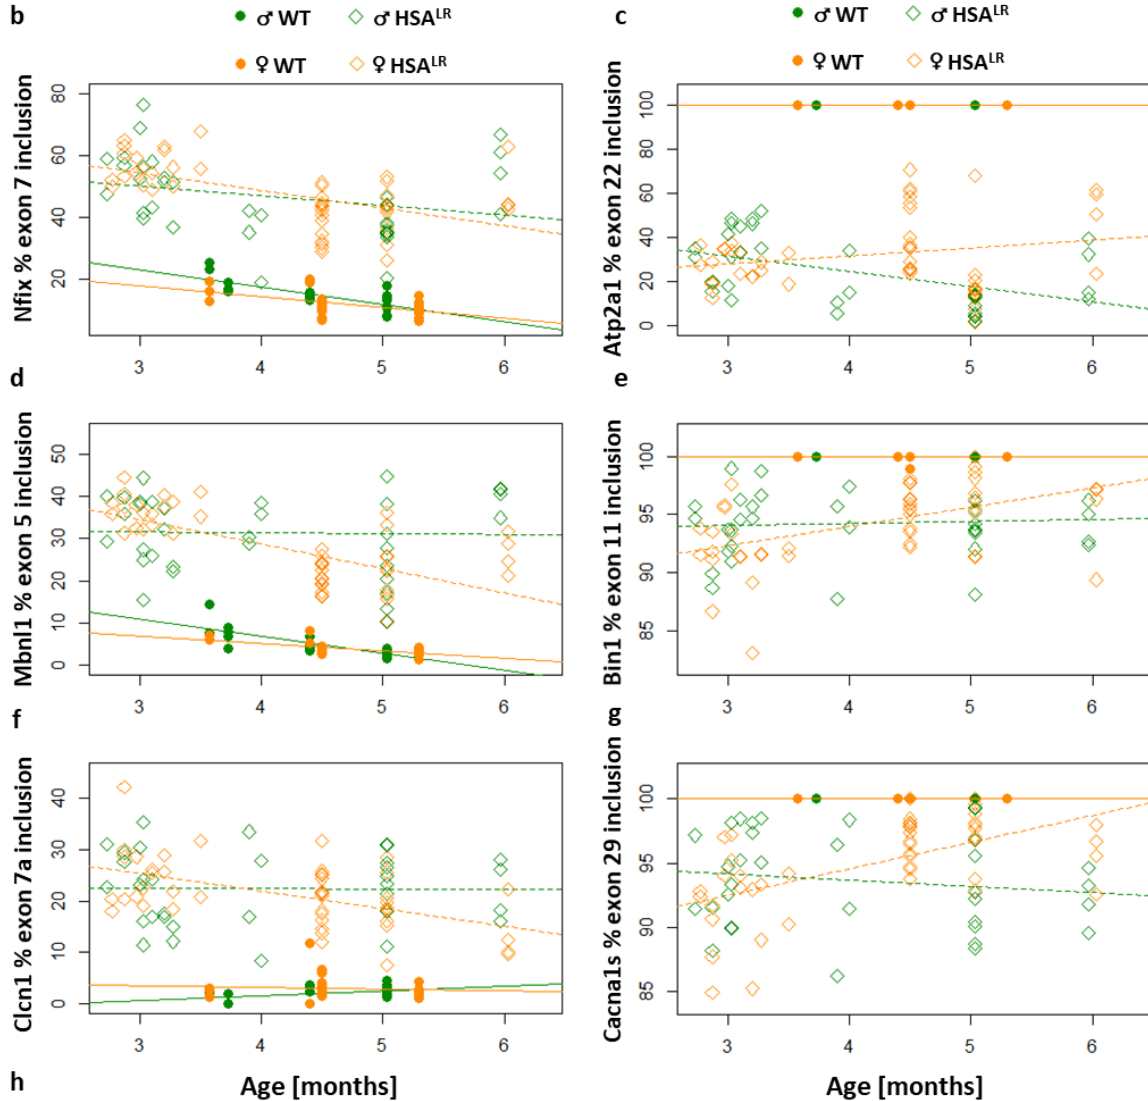

| Three-ways ANOVA               |              | Source of variation (p-values) |                |           |                |               |               |  |
|--------------------------------|--------------|--------------------------------|----------------|-----------|----------------|---------------|---------------|--|
| Phenotype                      | Genotype     | Sex                            | Age            | Sex*Genot | Genot*age      | Sex*age       | Sex*Genot*age |  |
| <i>Nfix</i> % ex7 inclusion    | <2e-16 (***) | 0.335                          | 5.63e-07 (***) | 0.279     | 0.921          | 0.270         | 0.312         |  |
| <i>Mbnl1</i> % ex5 inclusion   | <2e-16 (***) | 0.007706 (**)                  | 1.82e-06 (***) | 0.198557  | 0.702636       | 0.0005 (***)  | 0.022046 (*)  |  |
| <i>Clcn1</i> % ex7a inclusion  | <2e-16 (***) | 0.55217                        | 0.00378 (**)   | 0.25265   | 0.12176        | 0.00430 (**)  | 0.47200       |  |
| <i>Atp2a1</i> % ex22 inclusion | <2e-16 (***) | 0.004772 (**)                  | 0.304894       | 0.065142  | 0.75687        | 0.00026 (***) | 0.111360      |  |
| <i>Bin1</i> % ex11 inclusion   | <2e-16 (***) | 0.834939                       | 0.000835 (***) | 0.930813  | 0.00912 (**)   | 0.12199       | 0.255698      |  |
| <i>Cacna1s</i> ex29 inclusion  | <2e-16 (***) | 0.05353                        | 0.00581 (**)   | 0.16789   | 5.94e-05 (***) | 0.17588       | 0.07455       |  |

**Supplementary Figure 6. Analysis of alternative splicing defects (a)** Two-way ANOVA analysis shows that genotype determines the muscle splicing pattern; minor effects are observed due to the sex of the animals. **(b-g)** Data from Figure 4 are represented according to the age of the animals. Trend lines are drawn: regular lines correspond to control animals, and dotted lines correspond to HSA<sup>LR</sup> animals. **(h)** Three-way ANOVA (Genotype, Sex and Age) is performed to detect the influence of age on the phenotypes. [\*\*\*:  $p < 0.001$ ; \*\*:  $p < 0.01$ ; \*:  $p < 0.05$ ].



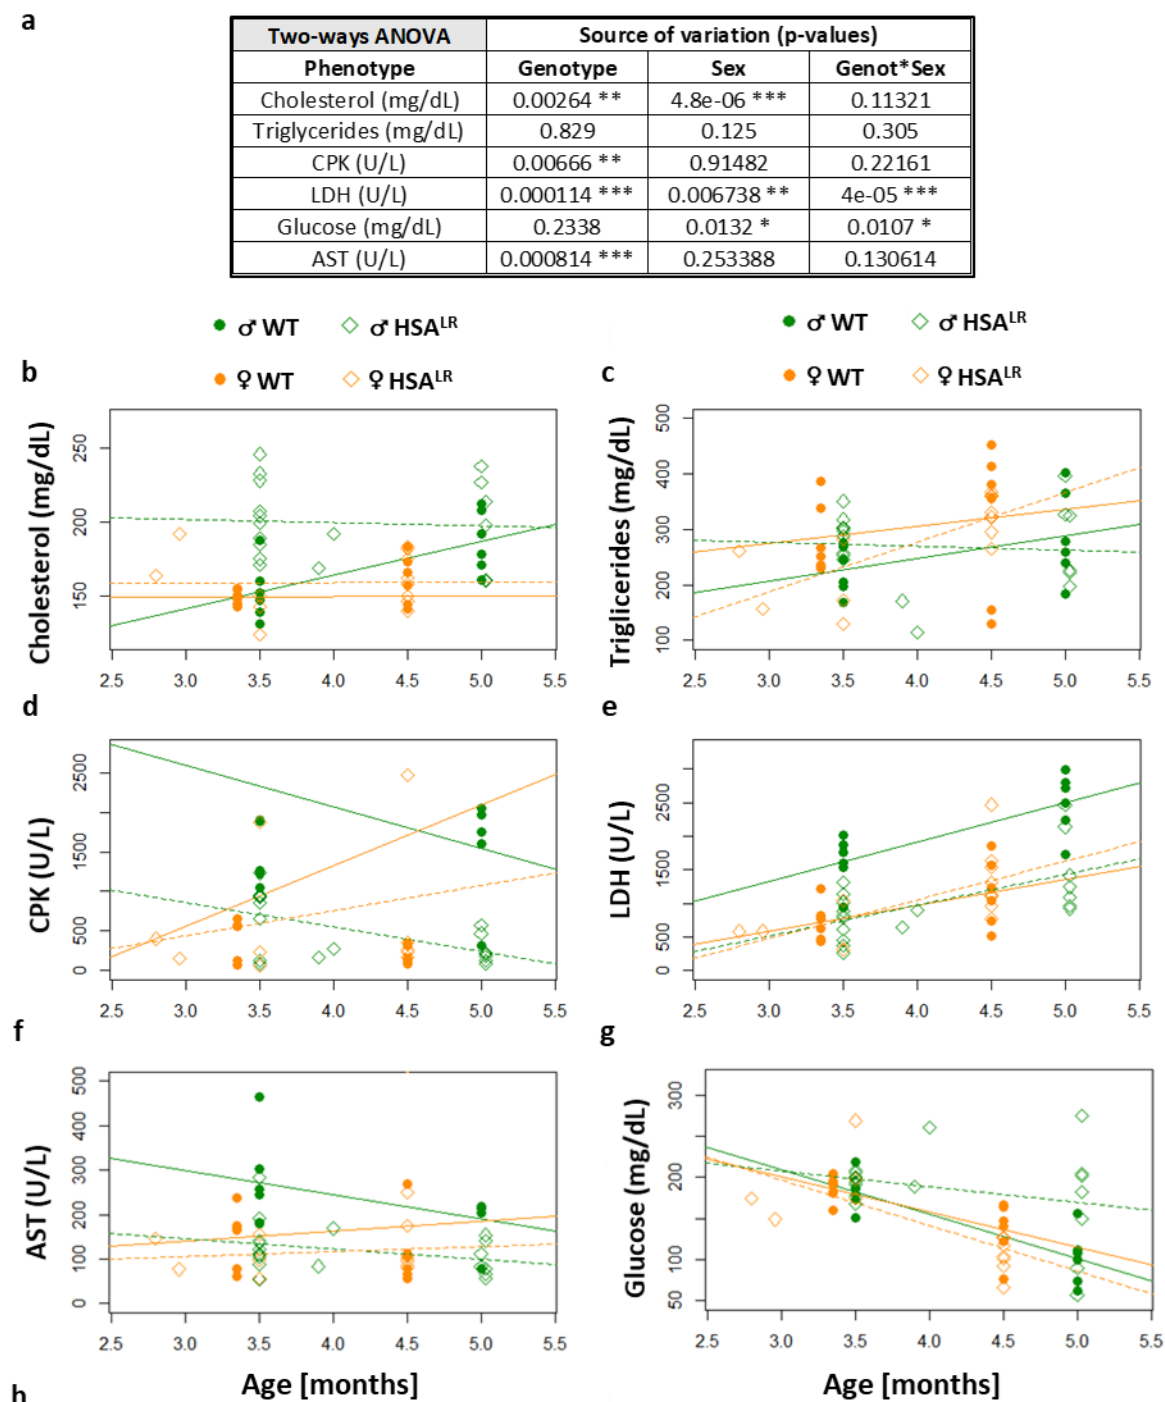

| Three-ways ANOVA      | Source of variation (p-values) |                |                |                |           |          |               |
|-----------------------|--------------------------------|----------------|----------------|----------------|-----------|----------|---------------|
| Phenotype             | Genotype                       | Sex            | Age            | Sex*Genot      | Genot*age | Sex*age  | Sex*Genot*age |
| Cholesterol (mg/dL)   | 0.00253 (**)                   | 2.3e-06 (***)  | 0.31930        | 0.10699        | 0.10569   | 0.42091  | 0.20645       |
| Triglycerides (mg/dL) | 0.7652                         | 0.1817         | 0.0446 (*)     | 0.2922         | 0.1032    | 0.7877   | 0.0902        |
| CPK (U/L)             | 0.00673 (**)                   | 0.91754        | 0.88709        | 0.22090        | 0.94978   | 0.09707  | 0.54369       |
| LDH (U/L)             | 7.60e-05 (***)                 | 0.000809 (***) | 1.14e-07 (***) | 6.01e-05 (***) | 0.978031  | 0.903693 | 0.391266      |
| Glucose (mg/dL)       | 0.15990                        | 0.05721        | 1.9e-06 (***)  | 0.00978 (**)   | 0.26681   | 0.30702  | 0.14073       |
| AST (U/L)             | 0.000947 (***)                 | 0.291094       | 0.374340       | 0.131598       | 0.659452  | 0.139528 | 0.541457      |

**Supplementary Figure 7. Analysis of plasma biochemical parameters (a)** Two-way ANOVA summary of plasma parameters. **(b-g)** Data from Figure 5 are represented according to the age of the animals. Tendency lines are drawn: regular lines correspond to control animals, and dotted lines correspond to HSA<sup>LR</sup> animals. **(h)** Three-way ANOVA (Genotype, Sex and Age) is performed to detect the influence of age on the phenotypes. [\*\*\*:  $p < 0.001$ ; \*\*:  $p < 0.01$ ; \*:  $p < 0.05$ ].

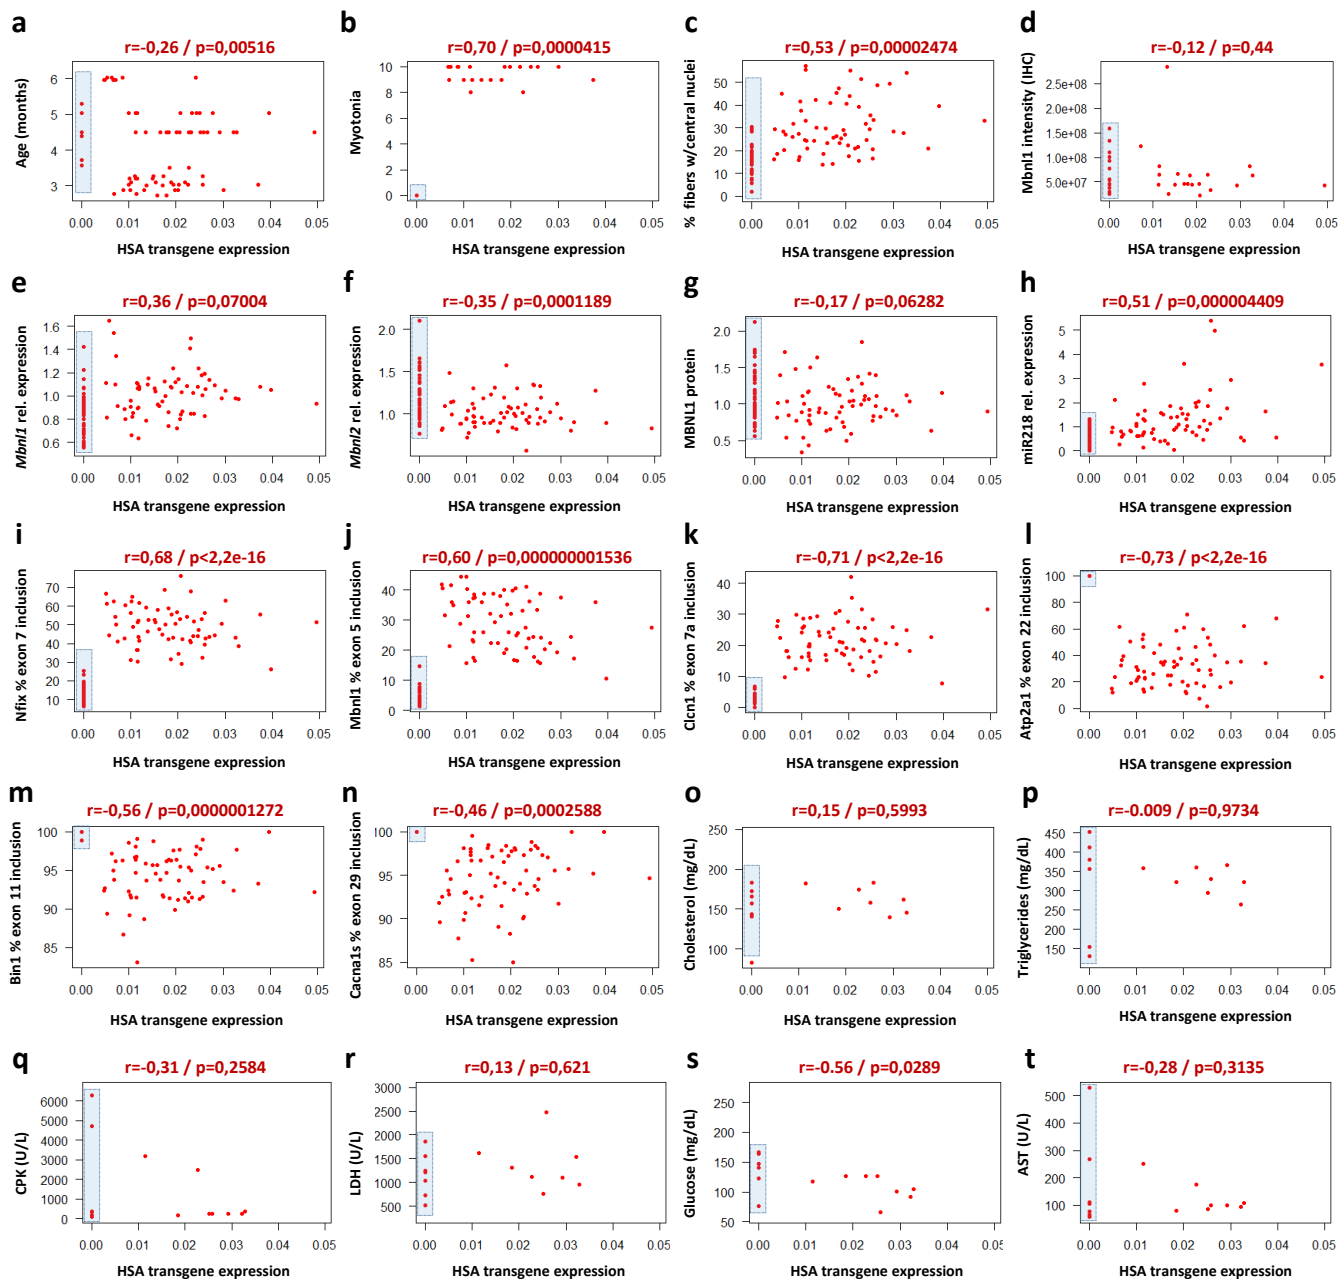

**Supplementary Figure 8. Correlation analysis.** Correlations of the different phenotypes studied in this paper with the presence of the *HSA* transgene: **(a)** age; **(b)** myotonia; **(c)** percentage of fibers with central nuclei; **(d)** Mbn1 intensity; **(e)** *Mbn1* relative expression; **(f)** *Mbn12* relative expression; **(g)** MBNL1 protein; **(h)** *miR-218* relative expression; percentage of abnormal inclusion of **(i)** exon 7 in *Nfix*, **(j)** exon 5 in *Mbn1*, **(k)** exon 7a in *Clcn1*; percentage of abnormal exclusion of **(l)** exon 22 in *Atp2A1*, **(m)** exon 11 in *Bin1*, **(n)** exon 29 in *Cacna1s*; **(o)** cholesterol levels; **(p)** triglycerides levels; **(q)** CPK levels; **(r)** LDH levels; **(s)** glucose levels; and **(t)** AST levels. Data from WT mice, which do not carry the *HSA* transgene, are marked in blue boxes.
